# Supplementary material for: Casein Kinase 1α as a Novel Factor Affects Thyrotropin Synthesis via PKC/ERK/CREB Signaling
Source: MDPI journal article supplement (doi:10.3390/ijms24087034), 2023-04-11
Supplement: s1 [file s1]

## SUPPLEMENTARY MATERIALS

**Table S1. Weight of mice (mean  $\pm$  SD, n = 5)**

| Group                | Weight (g)       |                  |                  |                  |                  |                  |                  |                  |
|----------------------|------------------|------------------|------------------|------------------|------------------|------------------|------------------|------------------|
|                      | D0               | D2               | D4               | D6               | D8               | D10              | D12              | D14              |
| Control-1            | 21.28 $\pm$ 2.87 | 21.40 $\pm$ 2.86 | 21.14 $\pm$ 2.81 | 21.17 $\pm$ 2.73 | 21.41 $\pm$ 2.63 | 21.52 $\pm$ 2.71 | 22.84 $\pm$ 2.85 | 23.06 $\pm$ 3.01 |
| D4476 (1 mg/mL)      | 22.31 $\pm$ 1.30 | 22.42 $\pm$ 1.36 | 21.70 $\pm$ 1.69 | 21.91 $\pm$ 1.26 | 22.34 $\pm$ 1.06 | 21.75 $\pm$ 0.78 | 22.28 $\pm$ 0.65 | 23.37 $\pm$ 1.06 |
| Control-2            | 31.88 $\pm$ 0.76 | 31.65 $\pm$ 0.67 | 30.65 $\pm$ 1.36 | 30.32 $\pm$ 1.43 | 30.16 $\pm$ 1.57 | 30.12 $\pm$ 1.94 | 30.86 $\pm$ 1.39 | 31.32 $\pm$ 1.34 |
| Pyrrvinium (5 mg/mL) | 32.43 $\pm$ 0.62 | 32.23 $\pm$ 0.68 | 31.36 $\pm$ 0.82 | 31.37 $\pm$ 1.03 | 30.7 $\pm$ 1.22  | 30.12 $\pm$ 0.88 | 30.58 $\pm$ 1.03 | 30.88 $\pm$ 1.09 |

**Table S2. Visceral ratio (mean  $\pm$  SD, n = 5)**

| <b>Group</b>               | <b>Heart (g)</b>     | <b>Liver(g)</b>       | <b>Kidney(g)</b>      | <b>Testis(g)</b>     |
|----------------------------|----------------------|-----------------------|-----------------------|----------------------|
| <b>Control-1</b>           | 5.3118 $\pm$ 0.63605 | 37.7322 $\pm$ 1.76314 | 15.3818 $\pm$ 2.05882 | 8.4952 $\pm$ 1.02917 |
| <b>D4476 (1 mg/mL)</b>     | 4.9614 $\pm$ 0.37106 | 37.4405 $\pm$ 2.56482 | 14.3418 $\pm$ 0.45137 | 8.7220 $\pm$ 0.54971 |
| <b>Control-2</b>           | 4.5606 $\pm$ 0.28835 | 38.2290 $\pm$ 2.65378 | 11.9062 $\pm$ 2.19537 | 9.9866 $\pm$ 1.63244 |
| <b>Pyrvinium (5 mg/mL)</b> | 4.6494 $\pm$ 0.98788 | 39.4565 $\pm$ 2.20680 | 12.2400 $\pm$ 0.71699 | 9.8987 $\pm$ 0.43588 |

**Table S3. Organ coefficient (mean  $\pm$  SD, n = 5)**

| <b>Group</b>               | <b>Cardiac index<br/>(mg/g)</b> | <b>Liver index<br/>(mg/g)</b> | <b>Kidney index<br/>(mg/g)</b> | <b>Testicular index<br/>(mg/g)</b> |
|----------------------------|---------------------------------|-------------------------------|--------------------------------|------------------------------------|
| <b>Control-1</b>           | 0.2360 $\pm$ 0.04803            | 1.6575 $\pm$ 0.15304          | 0.6787 $\pm$ 0.09503           | 0.3797 $\pm$ 0.09654               |
| <b>D4476 (1 mg/mL)</b>     | 0.1819 $\pm$ 0.01572            | 1.4869 $\pm$ 0.11394          | 0.5249 $\pm$ 0.02599           | 0.3607 $\pm$ 0.02835               |
| <b>Control-2</b>           | 0.1459 $\pm$ 0.01154            | 1.2238 $\pm$ 0.11223          | 0.3795 $\pm$ 0.06706           | 0.3205 $\pm$ 0.06170               |
| <b>Pyrvinium (5 mg/mL)</b> | 0.1548 $\pm$ 0.0363             | 1.3271 $\pm$ 0.08385          | 0.4105 $\pm$ 0.03634           | 0.3173 $\pm$ 0.01310               |

**Table S4. Primer sequences for RT-PCR.**

| <b>Primer names</b>    | <b>Sequence</b>               |
|------------------------|-------------------------------|
| <i>Gapdh</i> forward   | 5'-AGCAATGCCTCCTGCACCACCA-3'  |
| <i>Gapdh</i> reverse   | 3'-TGAGTCCCTCCACGATGCCGAA-5'  |
| <i>Tshb</i> forward    | 5'-GTGCTGGGTATTGTATGACACG-3'  |
| <i>Tshb</i> reverse    | 3'-CTGGTATTTCCACCGTTCTGTAG-5' |
| <i>Csnk1a1</i> forward | 5'-GACCCAGCCTTGAAGACCTC-3'    |
| <i>Csnk1a1</i> reverse | 3'-CAGTGACGCCCAATACCCAT-5'    |
| <i>Gh</i> forward      | 5'-AGAACCGACATGGAATTGCTT-3'   |
| <i>Gh</i> reverse      | 3'-ATGTTGGCGTCAAACCTGTCA-5'   |
| <i>Pomc</i> forward    | 5'-GCAACGGAGATGAACAGCC-3'     |
| <i>Pomc</i> reverse    | 3'-CTTGTCCCTGGGCGGGTT-5'      |
| <i>Prl</i> forward     | 5'-GGAGAAGTGTGTTCCCAGC-3'     |
| <i>Prl</i> reverse     | 3'-CAGCGAATGGTGTTCGCGC-5'     |
| <i>Fsh</i> forward     | 5'-CTGAATGTCACTGTGGCAAGT-3'   |
| <i>Fsh</i> reverse     | 3'-GCAATGTCCATCGTCGTTTAT-5'   |
| <i>Lh</i> forward      | 5'-CTGCCCAGTCTGCATCACC-3'     |
| <i>Lh</i> reverse      | 3'-AGGCACAGGAGGCAAAGC-5'      |

**Table S5. Antibodies used in the study**

| Antibody                 | Dilution             | Description        | Company                   | CAT#        |
|--------------------------|----------------------|--------------------|---------------------------|-------------|
| CK1 $\alpha$             | 1:250 IHC, 1:2000 WB | Rabbit-polyclonal  | Abcam                     | ab64939     |
| $\alpha$ -Tubulin        | 1:10000 WB           | Rabbit-polyclonal  | Beyotime                  | AF0001      |
| CK1 $\alpha$             | 1:250 IF             | Chicken-polyclonal | Novus Biologicals         | NBP2-50030  |
| TSH-b                    | 1:200 IF             | Rabbit-polyclonal  | NIDDK                     |             |
| GH                       | 1:100 IF             | Rabbit-monoclonal  | Abcam                     | ab155276    |
| PRL                      | 1:150 IF             | Rabbit-polyclonal  | NHPP                      |             |
| FSH-b                    | 1:100 IF             | Rabbit-polyclonal  | NHPP                      |             |
| LH-b                     | 1:100 IF             | Rabbit-polyclonal  | NIDDK                     |             |
| ACTH                     | 1:200 IF             | Rabbit-polyclonal  | NHPP                      |             |
| p-CK1 $\alpha$           | 1:2000 WB            | Rabbit-polyclonal  | Bioss ANTIBODIES          | bs-12428R   |
| Active- $\beta$ -catenin | 1:2000 WB            | Rabbit-polyclonal  | Cell Signaling Technology | 8814        |
| $\beta$ -Catenin         | 1:2000 WB            | Rabbit-polyclonal  | Cell Signaling Technology | 8480        |
| p-PKC                    | 1:1000 WB            | Rabbit-polyclonal  | Millipore                 | AB5467      |
| PKC                      | 1:1000 WB            | Rabbit-polyclonal  | Wanleibio                 | WL02234     |
| p-ERK1/2                 | 1:300 WB             | Rabbit-polyclonal  | Wanleibio                 | WLP1512     |
| ERK1/2                   | 1:500 WB             | Rabbit-polyclonal  | Wanleibio                 | WL01864     |
| p-CREB                   | 1:1000 WB            | Rabbit-polyclonal  | Abmart                    | T55043      |
| CREB                     | 1:1000 WB            | Rabbit-polyclonal  | Abmart                    | T55426      |
| Cy3 donkey Anti-chicken  | 1:200 IF             | Donkey-polyclonal  | Jackson Immuno Research   | 703-165-155 |
| Cy2 donkey Anti-rabbit   | 1:200 IF             | Donkey-polyclonal  | Jackson Immuno Research   | 711-225-152 |
| Goat-anti-rabbit         | 1:200 IHC, 1:5000 WB | Goat-polyclonal    | Jackson Immuno Research   | 111-005-003 |
| Goat-anti-mouse          | 1:5000 WB            | Goat-polyclonal    | Jackson Immuno Research   | 111-005-003 |

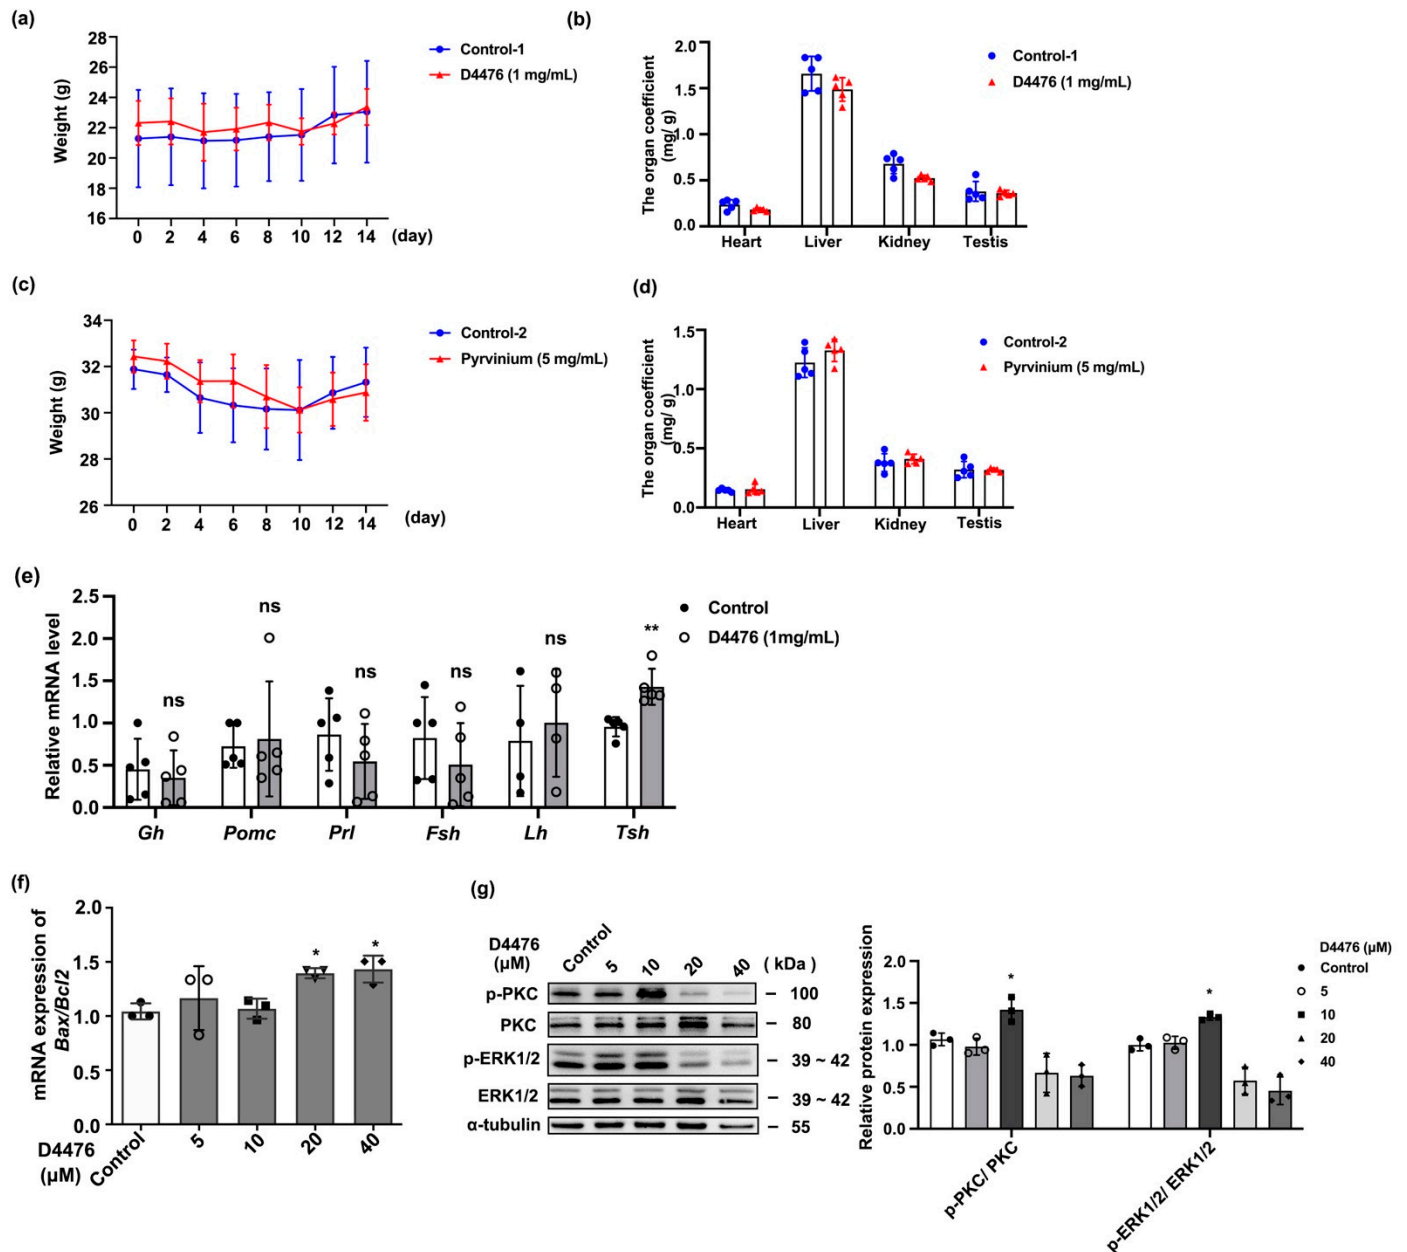

**Figure S1.** In vivo administration of D4476 and pyrvinium did not affect the key organ ratio and organ index. **(a, b)** D4476 (1 mg/mL) and pyrvinium (5 mg/mL) were administered for two weeks, and the weight change of mice was detected once every two days during the administration process. **(c, d)** After D4476 and PP administration for two weeks, key organs other than the pituitary gland, namely, the heart, liver, kidneys, and testes, were removed and the organ indices were measured. **(e)** After D4476 administration for two weeks, mRNA level of key pituitary hormone, namely, the *Gh* mRNA, *Pomc* mRNA, *Prl* mRNA, *Fsh* mRNA, *Lh* mRNA and the *Tsh* mRNA were measured by RT-PCR;  $n = 5$ .  $**P < 0.01$ . **(f, g)** After *in vitro* pituitary primary cells were treated with different concentrations of D4476 (5, 10, 20, and 40  $\mu$ M), quantitative levels of Bax/Bcl2 were determined to assess the damage to cells at different concentrations and to screen for appropriate treatment concentrations; the phosphorylation level of key proteins in PKC/ERK/CREB signal pathway was detected by western blot. Relative p-PKC, p-ERK1/2, and p-CREB protein levels were normalized to those of total PKC, ERK1/2, and CREB;  $n = 3$ .  $*P < 0.05$ .

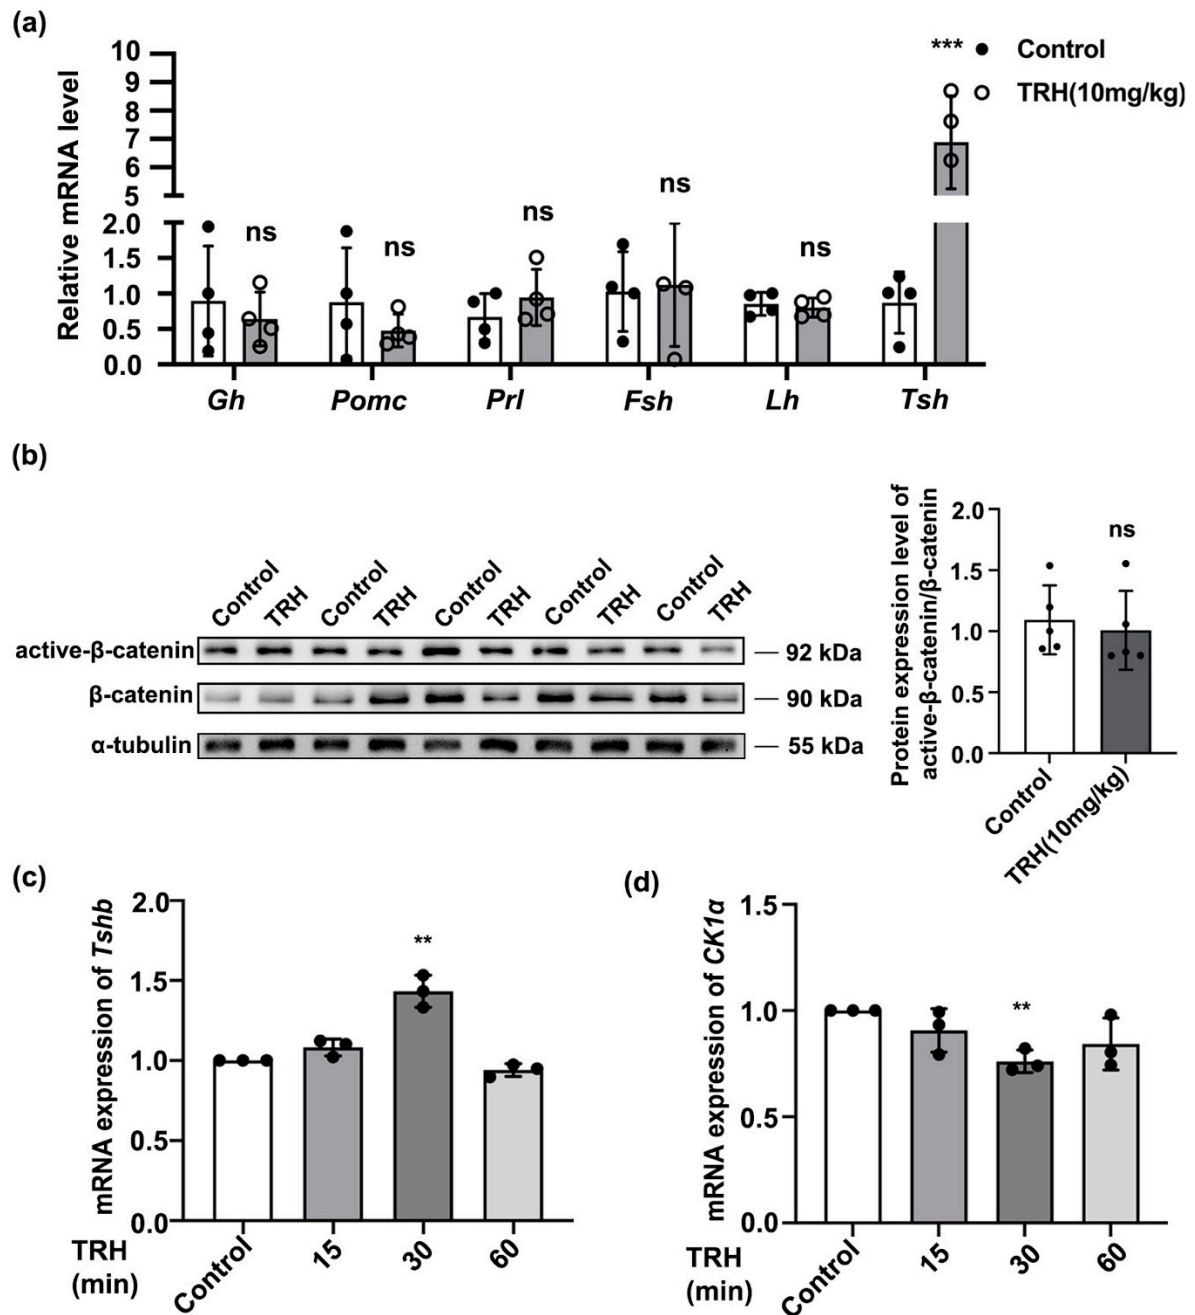

**Figure S2.** CK1 $\alpha$  regulates the TRH-PKC/ ERK/ CREB signaling pathway and affects TSH synthesis. (a) After TRH administration for 30 min, mRNA level of key pituitary hormone, namely, the *Gh* mRNA, *Pomc* mRNA, *Prl* mRNA, *Fsh* mRNA, *Lh* mRNA and the *Tsh* mRNA were measured by RT-PCR;  $n = 4$ . \*\*\* $P < 0.001$ . (b) The expression of Wnt/ b-catenin-related protein was detected after injection of 10 mg/kg TRH *in vivo*. Levels of active-  $\beta$ -catenin and  $\beta$ -catenin were analyzed by western blotting. The active-  $\beta$ -catenin/  $\beta$ -catenin protein expression level was determined using densitometry.  $n = 3$ . (c, d) To screen out the appropriate TRH action time, we detected the levels of *Tshb* mRNA and *CK1 $\alpha$*  mRNA by RT-PCR by treating pituitary primary cells with TRH for different times (15, 30, and 60 min). \*\* $P < 0.01$ .



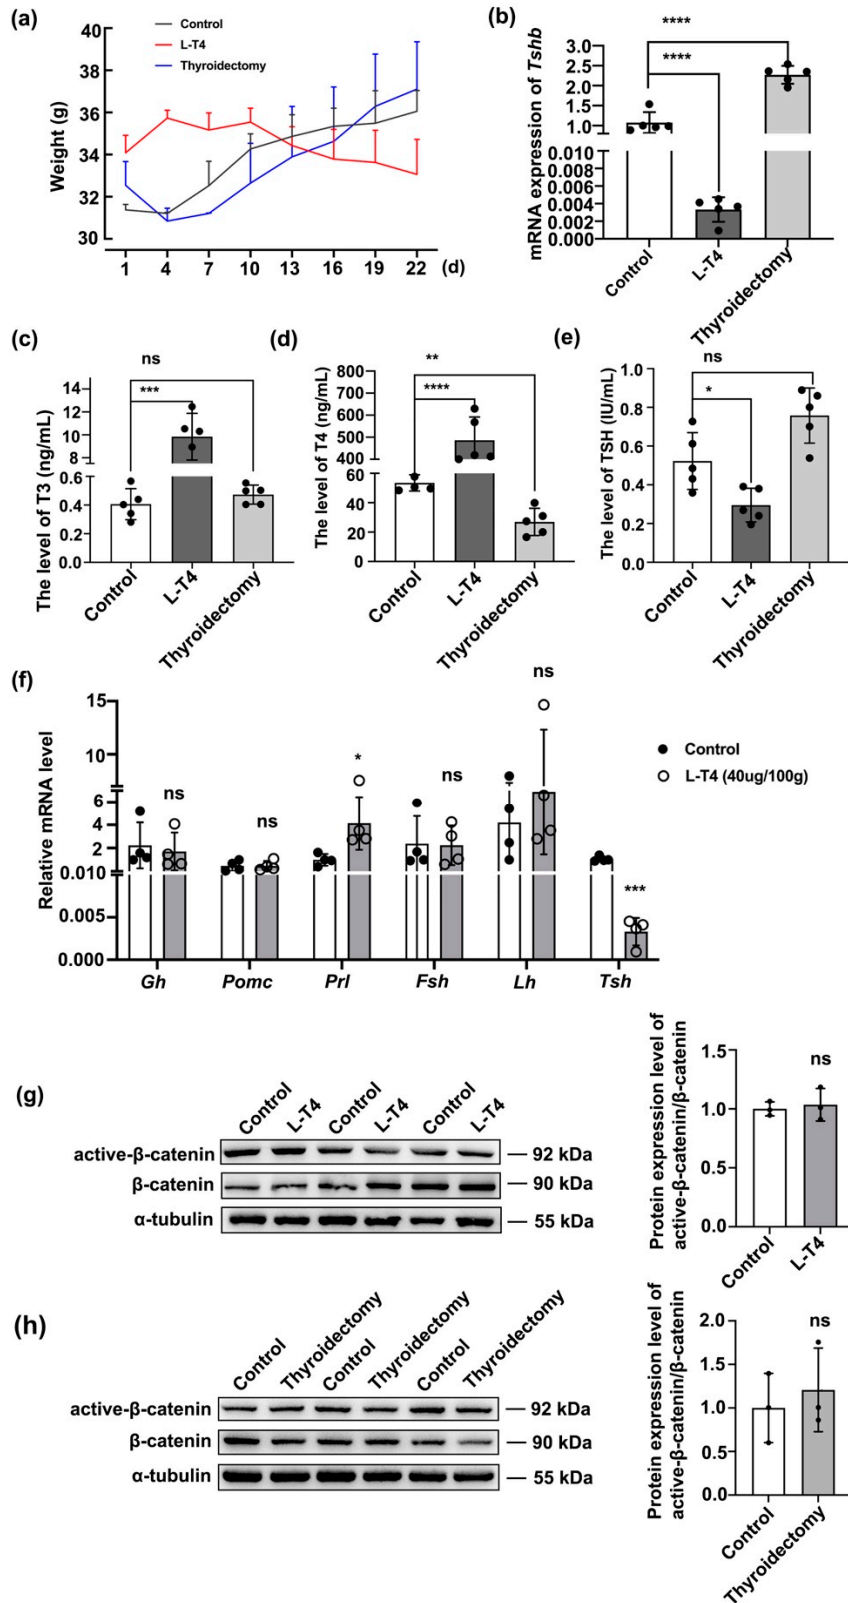

**Figure S3.** L-T4 enhances the activity of CK1α. **(a–e)** Negative feedback regulation of the HPT axis was simulated *in vivo*, and the synthesis and secretion of *Tshb* and TSH/T3/T4 were measured using RT-PCR and radioimmunoassay. \* $P < 0.05$ , \*\* $P < 0.01$ , \*\*\* $P < 0.001$ , \*\*\*\* $P < 0.0001$ . **(f)** After L-T4 administration for 30 min, mRNA level of key pituitary hormone, namely, the *Gh* mRNA, *Pomc* mRNA, *Prl* mRNA, *Fsh* mRNA, *Lh* mRNA and the *Tsh* mRNA were measured by RT-PCR;  $n = 4$ . \* $P < 0.05$ . **(g,h)** The effects of Wnt/β-catenin-related proteins were detected after *in vivo* injection of L-T4 and thyroidectomy; active-β-catenin and β-catenin expression levels were analyzed by western blotting. The active-β-catenin/β-catenin protein expression level was determined using densitometry.  $n = 3$ .

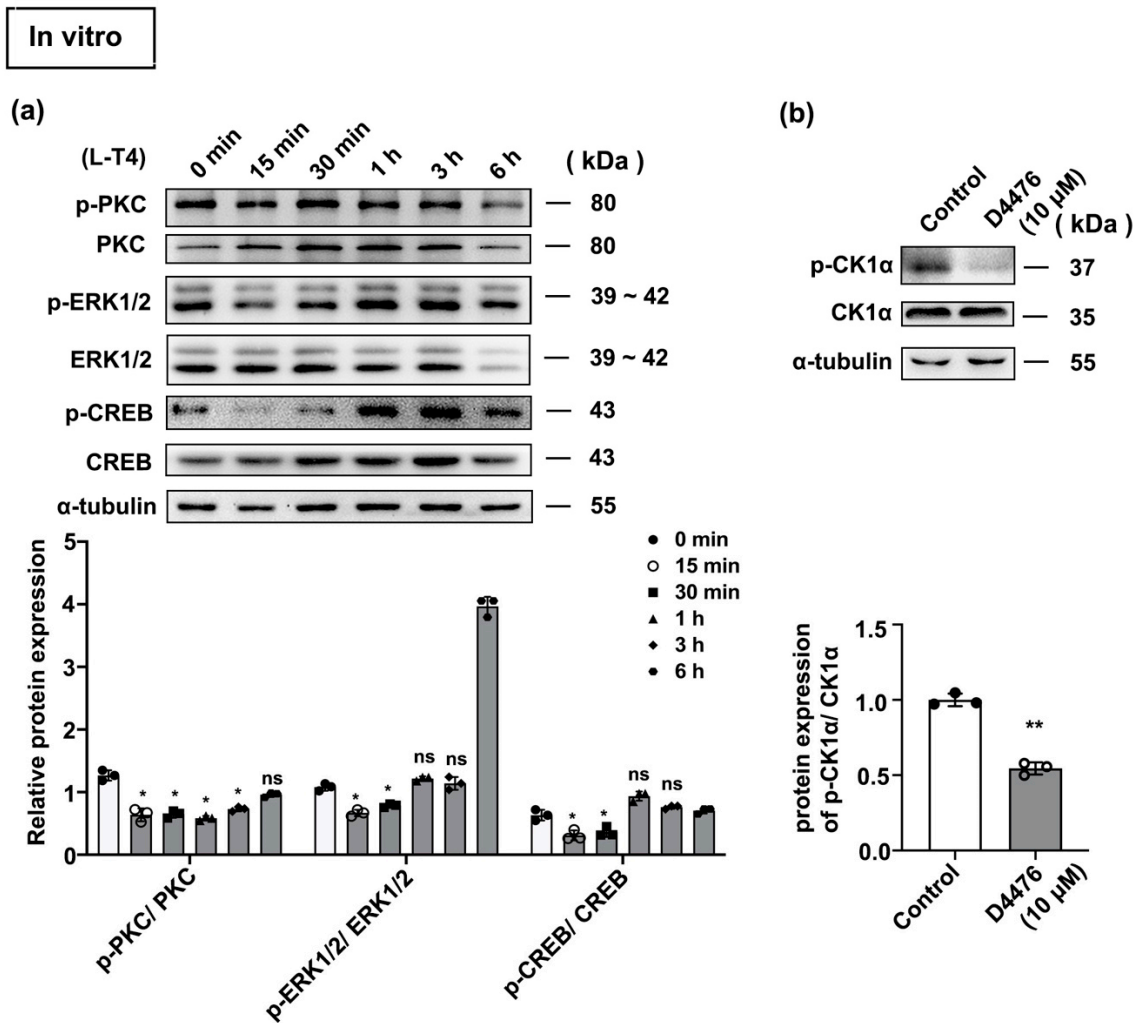

**Figure S4.** L-T4 inhibits TSH synthesis by promoting post-translational modification of CK1 $\alpha$  to inhibit activation of the PKC/ERK/CREB pathway. **(a)** Primary pituitary cells were stimulated with 10  $\mu$ M L-T4 for 0 min, 15 min, 30 min, 1 h, 3 h, or 6 h. Levels of p-PKC, and then p-ERK1/2, p-CREB, PKC, ERK1/2, and CREB levels were analyzed by western blotting. Relative p-PKC, p-ERK1/2, and p-CREB protein expression levels were determined using densitometry.  $n = 3$ . **(b)** The inhibition efficiency of CK1 $\alpha$  was determined using western blotting after D4476 (10  $\mu$ M) was added to primary cultured mouse adenohypophysis cells. \* $P < 0.05$ , \*\* $P < 0.01$ .

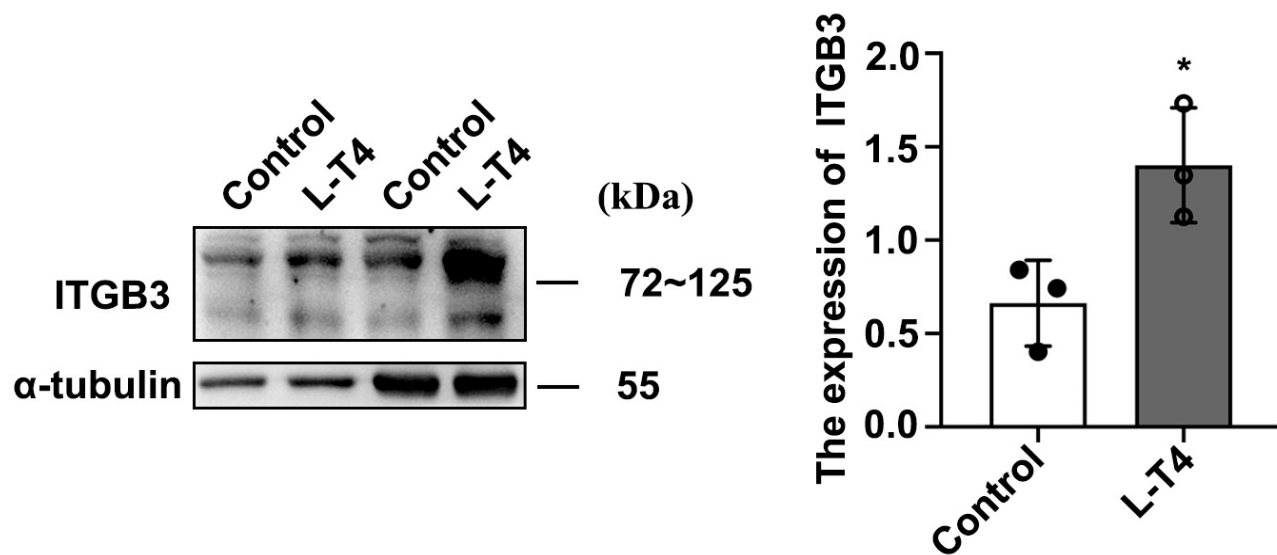

**Figure S5.** LT4 induces pituitary  $\alpha$ V $\beta$ 3 integrin receptor activation. Expression of ITGB3 was measured using western blotting with  $\alpha$ -tubulin as an internal reference. \* $P < 0.05$ .
